# Supplementary material for: Molecular and Physio-Biochemical Characterization of Cotton Species for Assessing Drought Stress Tolerance
Source: MDPI journal article supplement (doi:10.3390/ijms19092636), 2018-09-06
Supplement: s1 [file s1]

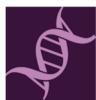

## Supplementary information

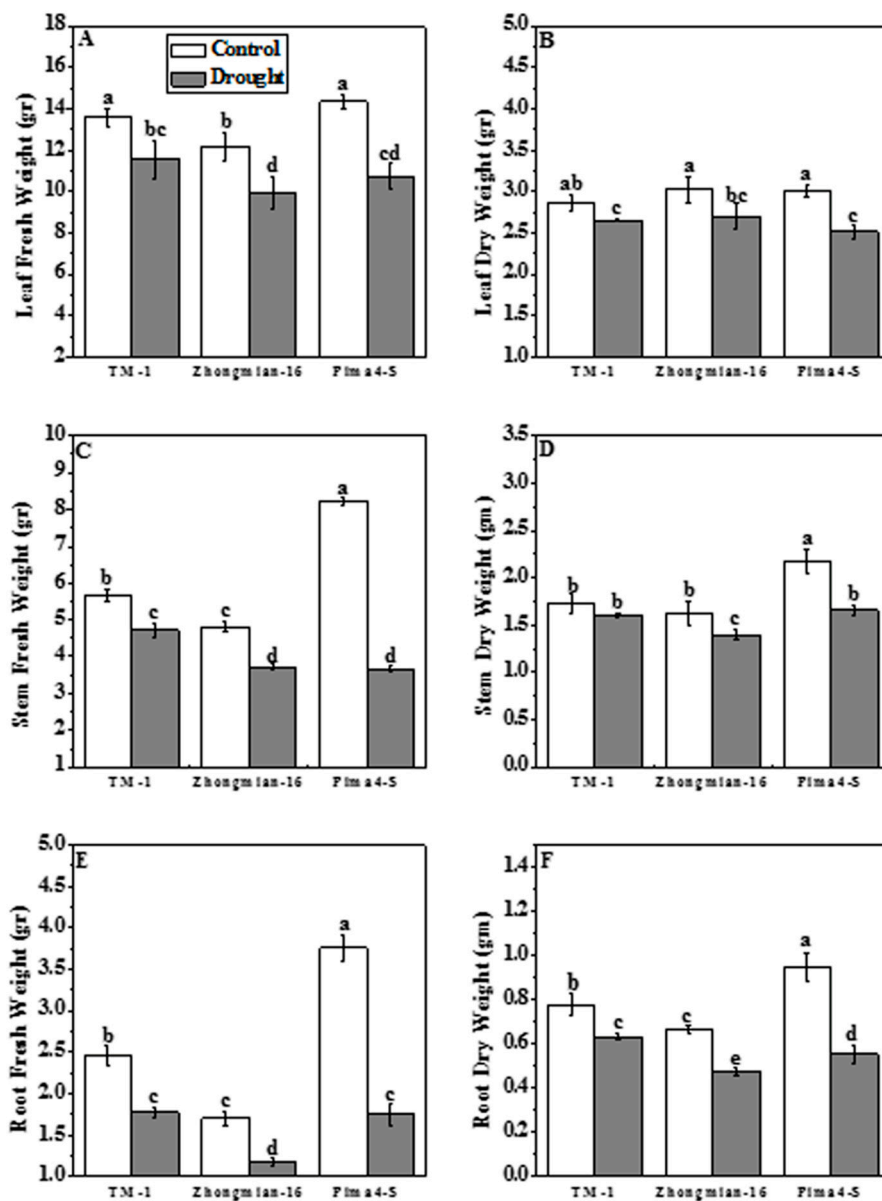

**Figure S1:** Effect of drought stress on fresh weight and dry weight of leaves, fresh weight and dry weight of stem, fresh weight and dry weight of root, in three-cotton species. Means denoted by the same letter are not significantly different at  $p < 0.05$ . Error bars are  $\pm$  SD ( $n = 4$ ).

**Table S1:** Na<sup>+</sup>, K<sup>+</sup> and other mineral elements of three cotton species exposure to drought.

| Genotype                            | Treatment | Mineral content (mg g <sup>-1</sup> DW) |                           |                           |                          |                           |                          |
|-------------------------------------|-----------|-----------------------------------------|---------------------------|---------------------------|--------------------------|---------------------------|--------------------------|
|                                     |           | Na                                      | K                         | Fe                        | Mn                       | Zn                        | Cu                       |
| TM-1                                | Control   | 1.16 ± 0.04 <sup>b</sup>                | 20.03 ± 0.51 <sup>e</sup> | 0.24 ± 0.02 <sup>b</sup>  | 0.05 ± 0.00 <sup>b</sup> | 0.03 ± 0.00 <sup>bc</sup> | 0.01 ± 0.00 <sup>b</sup> |
|                                     | Drought   | 1.26 ± 0.02 <sup>a</sup>                | 22.50 ± 0.08 <sup>c</sup> | 0.27 ± 0.03 <sup>a</sup>  | 0.05 ± 0.00 <sup>a</sup> | 0.04 ± 0.00 <sup>a</sup>  | 0.02 ± 0.00 <sup>a</sup> |
|                                     |           | (+8.76%)                                | (+12.33%)                 | (+11.84%)                 | (+14.90%)                | (+12.50%)                 | (+40.39%)                |
| Zhongmian-16                        | Control   | 0.79 ± 0.01 <sup>c</sup>                | 24.24 ± 0.39 <sup>b</sup> | 0.20 ± 0.02 <sup>c</sup>  | 0.04 ± 0.00 <sup>b</sup> | 0.03 ± 0.00 <sup>cd</sup> | 0.01 ± 0.00 <sup>b</sup> |
|                                     | Drought   | 0.82 ± 0.06 <sup>c</sup>                | 25.83 ± 0.07 <sup>a</sup> | 0.21 ± 0.01 <sup>bc</sup> | 0.04 ± 0.00 <sup>b</sup> | 0.03 ± 0.00 <sup>b</sup>  | 0.02 ± 0.00 <sup>a</sup> |
|                                     |           | (+4.41%)                                | (+6.58%)                  | (+4.72%)                  | (+3.26%)                 | (+7.79%)                  | (+38.76%)                |
| Pima4-S                             | Control   | 0.36 ± 0.03 <sup>d</sup>                | 21.31 ± 0.33 <sup>d</sup> | 0.20 ± 0.01 <sup>c</sup>  | 0.04 ± 0.00 <sup>b</sup> | 0.03 ± 0.00 <sup>cd</sup> | 0.01 ± 0.00 <sup>b</sup> |
|                                     | Drought   | 0.37 ± 0.01 <sup>d</sup>                | 22.49 ± 0.27 <sup>c</sup> | 0.20 ± 0.01 <sup>c</sup>  | 0.04 ± 0.00 <sup>b</sup> | 0.03 ± 0.00 <sup>d</sup>  | 0.02 ± 0.00 <sup>a</sup> |
|                                     |           | (+2.07%)                                | (+5.51%)                  | (+0.76%)                  | (+4.39%)                 | (-1.57%)                  | (+29.87%)                |
| LSD <sub>0.05</sub> between species |           | 0.06                                    | 0.62                      | 0.03                      | 0.01                     | 0.00                      | 0.00                     |

Results are presented as the mean of 4 individual measurements. Means denoted by the same letter are not significantly different at  $p < 0.05$ . Error bars are  $\pm$  SD ( $n = 4$ ). Values in parenthesis are expressed as a decreased (-)/increased (+) percentage of the control.
